# Supplementary material for: CDK8-Cyclin C Mediates Nutritional Regulation of Developmental Transitions through the Ecdysone Receptor in Drosophila
Source: PLoS Biol. 2015 Jul 29;13(7):e1002207. doi: 10.1371/journal.pbio.1002207 (PMC4519132; doi:10.1371/journal.pbio.1002207)
Supplement: S1 Data — (XLSX) [file pbio.1002207.s001.xlsx]

## Sheet: TOC
Table of Contents
Figure 1G	The percentage of pupariated animals after egg laying (AEL)
Figure 1H	The time from egg deposition to pupariation
Figure 2B,C	Validation of the microarray data by qRT-PCR in the L3 wandering larvae
Figure 3A,B	Expression of the Halloween genes and genes for regulating metabolism or development in the L3 wandering larvae
Figure 3C	Ecdysteroid titers determined by ELISA
Figure 3G	Quantification of the effect of 20E (200 μM) on the time from egg deposition to pupariation in cdk8 and cycC mutants
Figure 5D	Quantification of EcR target gene expression in salivary glands by qRT-PCR
Figure 5E	ChIP assay of USP binding to EcR target gene promoters in the w1118,cdk8K185, and cycCY5 mutant larvae
Figure 6H	Yeast two-hybrid analyses show that EcR-AF1, but not EcR-AF2 or USP-AF1/2, can directly bind to CDK8 and Med14
Figure 7C-K	The mRNA levels of cdk8, cycC, EcR, usp, E75, E78, SREBP, dFAS, and dACS from L3 (92 hr AEL) to the WPP stage (120hr AEL)
Figure 8B-G	The mRNA levels of cdk8, EcR, E74, SREBP, dFAS and dACS in feeding vs. starved larvae from 84 hr to 100 hr AEL
Figure 8H	The effect of starvation and refeeding on the timing of the larval-pupal transition in wild-type (w1118) larvae
Figure 9D	The mRNA levels of cdk8 in starved vs. refed larvae after 1, 2, 3 hrs of refeeding
Figure 9E-H	The mRNA levels of EcR, SREBP, dFAS, and dACS in starved vs. refed larvae after 1, 2, 3 hrs of refeeding
Figure S2A	Percentage of pupae with the anterior spiracle everted
Figure S2B	The mRNA levels of cdk8 and cycC were analyzed by qRT-PCR using the third instar wandering larvae
Figure S6D, E	Quantification of the EcR/USP levels in nucleus and cytoplasm from immunostaining using ImageJ
Figure S7	The relative mRNA levels of dE2f1, Dp, and several E2F1 target genes in cdk8 and cycC mutants at L3 wandering stage analyzed by qRT-PCR assay
Figure S9A	The relative mRNA levels of CDK8 and CycC at different developmental stages analyzed by qRT-PCR
Figure S9B	The relative mRNA levels of E74 at different developmental stages analyzed by qRT-PCR
Figure S9C	The relative mRNA levels of ACC at different developmental stages analyzed by qRT-PCR
Figure S10A-D	The effect of starvation on the expression of cycC , usp, E75, and E78 assayed by qRT-PCR
Figure S10E	The effect of starvation on the biosynthesis of ecdysteroid measured by ELISA
Figure S11A-F	The mRNA levels of cycC, usp, E74, E75, E78 and dACC in starved vs. refed larvae after 1, 2, 3 hrs of refeeding
Figure S12B-K	The mRNA levels of cdk8, cycC, EcR, usp, E75, E78, SREBP, dFAS, dACC, and dACS in starved vs. refed larvae after 3, 6, 9 hrs of refeeding

## Sheet: Figure 1G
Figure 1G The percentage of pupariated animals after egg laying (AEL)
% pupariated
Days after egg laying (AEL)	w1118	cdk8K185	cycCY5	cdk8K185, cycCY5	Cdk8-EGFP; cdk8K185	CycC-EGFP; cycCY5
3	0	0	0	0	0	0
3.5	0	0	0	0	0	0
4	0	0	0	0	0	0
4.5	5.71428	0	0	0	0	0
5	60.9524	0	0	0	65	7.51445
5.5	90.2367	0	0	0	90.4545	89.0173
6	97.0414	0	3.50877	0	95.4545	95.9538
6.5	98.5207	0	25.4386	8.15789	97.7273	98.2659
7	99.7041	2.27372	59.6491	22.8947	97.7273	99.422
7.5	100	5.2356	85.0877	51.3158	98.1818	99.422
8	100	33.6749	92.9825	67.8947	99.0909	100
8.5	100	73.3766	95.614	81.0526	99.0909	100
9	100	91.5584	98.2456	87.8947	99.0909	100
9.5	100	100	100	92.3684	100	100
10	100	100	100	94.4737	100	100
10.5	100	100	100	97.3684	100	100
11	100	100	100	98.1579	100	100

## Sheet: Figure 1H
Figure 1H The time from egg deposition to pupariation
Hours
	repeat I	repeat II	repeat III	average	SD	t-test
w1118	127.172	128	125.829	127	1.09583
cdk8K185	190.208	199.728	197	195.645	4.90245	9.44696e-06	**
cycCY5	172.737	167.415	178.39	172.847	5.48864	7.16456e-05	**
cdk8K185, cycCY5	193.36	191	191.91	192.09	1.19022	1.27053e-07	**
Cdk8-EGFP; cdk8K185	133.5	126.3	120.545	126.782	6.4907	0.478481
CycC-EGFP; cycCY5	133.448	132.842	-	133.145	0.428627	0.00270536

## Sheet: Figure 2B, C
Figure 2B,C Validation of the microarray data by qRT-PCR in the L3 wandering larvae
Plate I									Plate II
Sample Name	Target Name	Folds	Folds Mean	S.D.	Normalized Folds Mean	Normalized S.D.	t-test		Sample Name	Target Name	Folds	Folds Mean	S.D.	Normalized Folds Mean	Normalized S.D.	t-test
wt1	hsp27	1	0.687887	0.270501	1	0.393235			wt1	sgs1-1	1	1.02029	0.0744585	1	0.0729778
wt2	hsp27	0.521354							wt2	sgs1-1	1.10279
wt3	hsp27	0.542306							wt3	sgs1-1	0.958078
wt1	Br	1	0.755779	0.214719	1	0.284103			k8-1	sgs1-1	0.00630994	0.013065	0.0059554	0.0128052	0.00583697	9.96048e-06	**
wt2	Br	0.596641							k8-2	sgs1-1	0.0153272
wt3	Br	0.670695							k8-3	sgs1-1	0.0175578
k1	Br	0.27257	0.248003	0.0234161	0.328142	0.0309827	0.00759967	**	c1	sgs1-1	0.0356593	0.0450002	0.0103689	0.0441054	0.0101627	1.16138e-05	**
k2	Br	0.225939							c2	sgs1-1	0.0431842
k3	Br	0.245499							c3	sgs1-1	0.0561571
c1	Br	0.139673	0.164388	0.023116	0.217509	0.0305857	0.00450827	**	wt1	sgs5-1	1	1.12489	0.11887	1	0.105673
c2	Br	0.168016							wt2	sgs5-1	1.23665
c3	Br	0.185476							wt3	sgs5-1	1.13801
k1	hsp27	0.112654	0.0909511	0.0192255	0.132218	0.0279486	0.0094487	**	k8-1	sgs5-1	0.0275886	0.03332	0.0273391	0.0296208	0.0243039	5.05571e-05	**
k2	hsp27	0.0841436							k8-2	sgs5-1	0.00930094
k3	hsp27	0.0760557							k8-3	sgs5-1	0.0630704
wt1	E74	1	0.815094	0.162574	1	0.199454			c1	sgs5-1	0.130841	0.132284	0.0042681	0.117598	0.00379424	6.65966e-05	**
wt2	E74	0.694574							c2	sgs5-1	0.137087
wt3	E74	0.750708							c3	sgs5-1	0.128925
k1	E74	0.492188	0.541411	0.0535125	0.664231	0.0656519	0.0251752	*
k2	E74	0.533673
k3	E74	0.598371
c1	E74	0.355396	0.371936	0.019266	0.456311	0.0236366	0.0046939	**	Plate III
c2	E74	0.39309							Sample Name	Target Name	fold	fold (mean)	fold (s.d.)	normalized
c3	E74	0.367323							wt1	jheh1	1	0.746065	0.23278	1	0.312011
c1	hsp27	0.0630277	0.0647866	0.0106861	0.0941821	0.0155347	0.0094487	**	wt2	jheh1	0.695414
c2	hsp27	0.0762431							wt3	jheh1	0.54278
c3	hsp27	0.0550891							k8-1	jheh1	2.10189	2.51664	0.536087	3.37322	0.718553	0.00315452	**
wt1	E75	1	0.790268	0.215353	1	0.272506			k8-2	jheh1	3.12198
wt2	E75	0.569704							k8-3	jheh1	2.32604
wt3	E75	0.8011							c1	jheh1	1.86397	1.85196	0.441	2.48231	0.591102	0.00922035	**
k1	E75	0.44492	0.495769	0.0440439	0.627343	0.0557329	0.0405426	*	c2	jheh1	2.28684
k2	E75	0.520386							c3	jheh1	1.40508
k3	E75	0.522							wt1	impE2	1	0.597043	0.34938	1	0.585184
c1	E75	0.383715	0.380628	0.0371727	0.481644	0.0470381	0.0157374	*	wt2	impE2	0.378665
c2	E75	0.41616							wt3	impE2	0.412464
c3	E75	0.342007							k8-1	impE2	0.0535298	0.0591257	0.00790457	0.0990308	0.0132395	0.0280182	*
wt1	E78	1	0.57653	0.410788	1	0.712518			k8-2	impE2	0.0556789
wt2	E78	0.179722							k8-3	impE2	0.0681684
wt3	E78	0.54987							c1	impE2	0.0400064	0.0398554	0.00962608	0.0667546	0.0161229	0.0253933	*
k1	E78	0.0539301	0.0329315	0.0188367	0.0571201	0.0326725	0.0419457	*	c2	impE2	0.0301547
k2	E78	0.0175214							c3	impE2	0.0494051
k3	E78	0.027343
c1	E78	0.0182734	0.0192472	0.00151506	0.0333845	0.0026279	0.0392698	*
c2	E78	0.0184754
c3	E78	0.0209927
wt1	jhl-26	1	1.08263	0.100503	1	0.0928324
wt2	jhl-26	1.05337
wt3	jhl-26	1.19451
wt1	EcR	1	0.871861	0.118721	1	0.136169	0.00501054	**
wt2	EcR	0.849979
wt3	EcR	0.765603
k1	EcR	0.481715	0.523444	0.0557363	0.600376	0.063928
k2	EcR	0.501876
k3	EcR	0.586741
c1	EcR	0.419117	0.466791	0.0595631	0.535397	0.0683172	0.00308057	**
c2	EcR	0.447697
c3	EcR	0.53356
k1	jhl-26	4.12043	3.77849	0.988128	3.49011	0.912713	0.00465001	**
k2	jhl-26	4.55022
k3	jhl-26	2.66481
wt1	Ftz-F1	1	1.21862	0.197245	1	0.161859
wt2	Ftz-F1	1.27262
wt3	Ftz-F1	1.38324
k1	Ftz-F1	4.07609	4.51979	0.413157	3.70894	0.339037	0.000118214	**
k2	Ftz-F1	4.89346
k3	Ftz-F1	4.58984
c1	Ftz-F1	7.07936	7.47545	0.367291	6.13435	0.301399	6.50624e-06	**
c2	Ftz-F1	7.54222
c3	Ftz-F1	7.80478
c1	jhl-26	3.93074	4.43207	1.20353	4.09381	1.11168	0.00431277	**
c2	jhl-26	5.80522
c3	jhl-26	3.56023
wt1	usp	1	0.989346	0.14063	1	0.142145
wt2	usp	0.843691
wt3	usp	1.12435
k1	usp	1.57132	1.4156	0.140099	1.43084	0.141607	0.0102442	*
k2	usp	1.29977
k3	usp	1.3757
c1	usp	1.2837	1.24464	0.139691	1.25804	0.141195	0.0447672	*
c2	usp	1.36064
c3	usp	1.08958

## Sheet: Figure 3A, B
Figure 3A,B Expression of the Halloween genes and genes for regulating metabolism or development in the L3 wandering larvae
Plate I									Plate II
Sample Name	Target Name	Folds	Folds mean	Folds S.D.	Normalized Folds Mean	Normalized S.D.	t-test		Sample Name	Target Name	Folds	Folds mean	Folds S.D.	Normalized Folds Mean	Normalized S.D.	t-test
w1118-1	Cyp18a1	1	0.718158	0.32139	1	0.44752			w1118-1	spok	1	1.01032	0.0363406	1	0.0359695
w1118-2	Cyp18a1	0.368155							w1118-2	spok	1.0507
w1118-3	Cyp18a1	0.78632							w1118-3	spok	0.980249
k185-1	Cyp18a1	0.648529	1.05161	0.417433	1.46431	0.581255	0.167263		k185-1	spok	0.230972	0.381001	0.147704	0.377111	0.146196	0.0010038	**
k185-2	Cyp18a1	1.02424							k185-2	spok	0.385766
k185-3	Cyp18a1	1.48205							k185-3	spok	0.526265
y5-1	Cyp18a1	0.561562	0.553763	0.0672068	0.771088	0.0935821	0.217377		y5-1	spok	0.227047	0.341255	0.106003	0.337771	0.10492	0.00024672	**
y5-2	Cyp18a1	0.482997							y5-2	spok	0.43649
y5-3	Cyp18a1	0.61673							y5-3	spok	0.360228
w1118-1	TOR	1	1.02786	0.0422898	1	0.0411437			w1118-1	ptth	1	1.07985	0.0896734	1	0.0830425
w1118-2	TOR	1.00705							w1118-2	ptth	1.17687
w1118-3	TOR	1.07652							w1118-3	ptth	1.06268
k185-1	TOR	1.01585	1.02569	0.0825789	0.997888	0.0803409	0.484811		k185-1	ptth	0.648625	0.682026	0.348842	0.631593	0.323047	0.0641467
k185-2	TOR	0.948463							k185-2	ptth	1.04637
k185-3	TOR	1.11274							k185-3	ptth	0.351086
y5-1	TOR	0.556677	0.68431	0.121465	0.665764	0.118173	0.0210907	*	y5-1	ptth	0.84355	0.77137	0.104898	0.714331	0.0971415	0.0179681	*
y5-2	TOR	0.697765							y5-2	ptth	0.651041
y5-3	TOR	0.798487							y5-3	ptth	0.81952
w1118-1	InR	1	0.954597	0.0432537	1	0.045311			w1118-1	nvd	1	1.08705	0.225975	1	0.207879
w1118-2	InR	0.913873							w1118-2	nvd	0.917545
w1118-3	InR	0.949918							w1118-3	nvd	1.3436
k185-1	InR	0.961112	0.857599	0.161318	0.898389	0.16899	0.185683		k185-1	nvd	1.38199	1.20211	0.415498	1.10585	0.382225	0.347573
k185-2	InR	0.671726							k185-2	nvd	0.726982
k185-3	InR	0.93996							k185-3	nvd	1.49736
y5-1	InR	0.809496	0.887741	0.177246	0.929964	0.185676	0.280057		y5-1	nvd	1.063	1.3971	0.329998	1.28522	0.303572	0.125251
y5-2	InR	0.763082							y5-2	nvd	1.72284
y5-3	InR	1.09064							y5-3	nvd	1.40545
w1118-1	Sro	1	0.786365	0.185724	1	0.23618
w1118-2	Sro	0.663324
w1118-3	Sro	0.69577
k185-1	Sro	0.545307	0.619822	0.0796775	0.788212	0.101324	0.113324
k185-2	Sro	0.610344							Plate III
k185-3	Sro	0.703814							Sample Name	Target Name	Folds	Folds mean	Folds S.D.	Normalized Folds Mean	Normalized S.D.	t-test
y5-1	Sro	0.182686	0.211339	0.077626	0.268755	0.098715	0.0038865	**	w1118-1	dib	1	0.859306	0.139597	1	0.162453
y5-2	Sro	0.299219							w1118-2	dib	0.720833
y5-3	Sro	0.152113							w1118-3	dib	0.857085
w1118-1	VVl	1	1.26998	0.234896	1	0.18496			k185-1	dib	1.22561	1.0128	0.213127	1.17862	0.248023	0.177817
w1118-2	VVl	1.38242							k185-2	dib	1.01342
w1118-3	VVl	1.42752							k185-3	dib	0.799357
k185-1	VVl	1.26624	1.2605	0.0725608	0.992538	0.0571353	0.474986		y5-1	dib	0.687944	0.631742	0.0937511	0.735177	0.109101	0.0395176	*
k185-2	VVl	1.18525							y5-2	dib	0.523514
k185-3	VVl	1.33003							y5-3	dib	0.683768
y5-1	VVl	0.923259	1.0046	0.101668	0.791032	0.0800546	0.0734711		w1118-1	phm	1	0.77053	0.200683	1	0.260448
y5-2	VVl	0.971952							w1118-2	phm	0.683745
y5-3	VVl	1.11858							w1118-3	phm	0.627845
w1118-1	Kni	1	0.881866	0.129631	1	0.146996			k185-1	phm	0.803838	0.673878	0.14054	0.874565	0.182393	0.265975
w1118-2	Kni	0.743191							k185-2	phm	0.524731
w1118-3	Kni	0.902406							k185-3	phm	0.693066
k185-1	Kni	0.722089	0.671654	0.110149	0.761629	0.124904	0.0495228		y5-1	phm	0.503443	0.455698	0.0669786	0.591408	0.0869254	0.0307453	*
k185-2	Kni	0.545318							y5-2	phm	0.484517
k185-3	Kni	0.747555							y5-3	phm	0.379133
y5-1	Kni	0.530306	0.576352	0.0734954	0.65356	0.0833408	0.011888	*	w1118-1	sad	1	0.710224	0.251792	1	0.354525
y5-2	Kni	0.537639							w1118-2	sad	0.544798
y5-3	Kni	0.661112							w1118-3	sad	0.585875
w1118-1	mld	1	0.944129	0.048574	1	0.0514485			k185-1	sad	0.418866	0.368735	0.055244	0.519181	0.0777838	0.0417216	*
w1118-2	mld	0.91192							k185-2	sad	0.309508
w1118-3	mld	0.920467							k185-3	sad	0.377831
k185-1	mld	1.08075	1.01086	0.0805776	1.07068	0.0853459	0.143299		y5-1	sad	0.341392	0.29822	0.0406697	0.419896	0.0572632	0.0244588	*
k185-2	mld	1.02911							y5-2	sad	0.292639
k185-3	mld	0.922726							y5-3	sad	0.260629
y5-1	mld	0.818256	0.847833	0.0345161	0.898006	0.0365587	0.160603		w1118-1	shd	1	0.766603	0.202186	1	0.263743
y5-2	mld	0.839486							w1118-2	shd	0.645047
y5-3	mld	0.885757							w1118-3	shd	0.654762
									k185-1	shd	1.01204	0.859881	0.145705	1.12168	0.190066	0.276069
									k185-2	shd	0.845986
									k185-3	shd	0.721621
									y5-1	shd	0.515034	0.491073	0.0234164	0.640583	0.0305457	0.0394863	*
									y5-2	shd	0.489942
									y5-3	shd	0.468242
									w1118-1	spo	1	0.569777	0.372594	1	0.653929
									w1118-2	spo	0.351987
									w1118-3	spo	0.357344
									k185-1	spo	0.436447	0.332408	0.205608	0.5834	0.360858	0.194351
									k185-2	spo	0.0955733
									k185-3	spo	0.465204
									y5-1	spo	0.25194	0.282028	0.296786	0.49498	0.520881	0.177244
									y5-2	spo	0.00143277
									y5-3	spo	0.592712

## Sheet: Figure 3C
Figure 3C Ecdysteroid titers determined by ELISA
20E	pg/mL	Total (0.5ml)	Larvae No.	pg/animal	average	SD	T-TEST
w1118 EL3-1	106.63	53.3149	10	5.33149	5.04521	3.69923
w1118 EL3-2	171.86	85.9298	10	8.59298
w1118 EL3-3	24.2233	12.1117	10	1.21117
w1118 EW-1	311.286	155.643	5	31.1286	36.6598	5.28083
w1118 EW-2	416.483	208.242	5	41.6483
w1118 EW-3	372.026	186.013	5	37.2026
w1118 LW-1	2077.82	1038.91	5	207.782	170.831	44.623
w1118 LW-2	1834.55	917.274	5	183.455
w1118 LW-3	1212.56	606.281	5	121.256
w1118 WP-1	2473.76	1236.88	5	247.376	289.131	66.36
w1118 WP-2	3656.51	1828.25	5	365.651
w1118 WP-3	2543.67	1271.83	5	254.367
K185 EL3-1	70.3775	35.1888	5	7.03775	7.15007	1.11736	0.199438
K185 EL3-2	60.9312	30.4656	5	6.09312
K185 EL3-3	83.1935	41.5968	5	8.31935
K185 EW-1	92.3476	46.1738	10	4.61738	7.15094	2.35242	0.000451798	**
K185 EW-2	185.321	92.6605	10	9.26605
K185 EW-3	151.388	75.6939	10	7.56939
K185 LW-1	422.346	211.173	10	21.1173	39.1348	16.4008	0.00433035	**
K185 LW-2	861.846	430.923	10	43.0923
K185 LW-3	1063.89	531.947	10	53.1947
K185 WP-1	1123.72	561.861	10	56.1861	63.1033	6.96217	0.00210676	**
K185 WP-2	756.171	378.086	6	63.0143
K185 WP-3	1402.19	701.096	10	70.1096
Y5 EL3-1	177.874	88.9371	5	17.7874	9.97473	6.96162	0.169854
Y5 EL3-2	77.0715	38.5358	5	7.70715
Y5 EL3-3	44.2961	22.1481	5	4.42961
Y5 EW-1	364.607	182.303	5	36.4607	20.9304	13.7331	0.0688625
Y5 EW-2	103.893	51.9465	5	10.3893
Y5 EW-3	159.412	79.7061	5	15.9412
Y5 LW-1	374.321	187.161	5	37.4321	49.9723	39.6874	0.012388	*
Y5 LW-2	180.698	90.3489	5	18.0698
Y5 LW-3	944.15	472.075	5	94.415
Y5 WP-1	2028.35	1014.17	5	202.835	227.047	39.0826	0.117564
Y5 WP-2	2061.71	1030.86	5	206.171
Y5 WP-3	2721.34	1360.67	5	272.134
EL=early L3
EW=early wandering
LW=late wandering
WP=white pre-pupae

## Sheet: Figure 3G
Figure 3G Quantification of the effect of 20E (200 μM) on the time from egg deposition to pupariation in cdk8 and cycC mutants
Hours AED	w1118		w1118		cdk8k185		cdk8k185				cycCy5				cycCy5
	ethanol-1	ethanol-2	20E-1	20E-2	ethanol-1	ethanol-2	20E-1	20E-2	20E-3	20E-4	ethanol-1	ethanol-2	ethanol-3	ethanol-4	20E-1	20E-2
80	0	0	0	0	0	0	0	0	0	0	0	0	0	0	0	0
88	0	0	0	0	0	0	0	0	0	0	0	0	0	0	0	0
96	0	3	0	2	0	0	0	0	0	0	0	0	0	0	0	0
104	0	11	0	8	0	0	0	0	0	0	0	0	0	0	0	0
112	18	167	3	72	0	0	0	0	0	0	0	0	0	0	0	0
120	80	108	72	206	0	0	0	0	0	0	0	0	0	0	0	0
128	107	10	137	156	0	0	0	0	0	1	0	0	0	0	1	0
136	56	3	77	29	0	0	0	0	0	0	0	1	0	0	0	0
144	14	1	18	5	0	0	0	0	0	0	0	2	0	0	3	0
152	8	3	6	4	0	0	0	0	0	0	2	3	0	2	18	4
160	7	0	13	0	0	0	0	1	4	1	12	2	2	3	38	16
168	1	0	0	0	0	0	0	0	1	2	0	0	10	5	0	16
176	0	0	2	0	4	1	5	12	7	7	6	0	8	0	7	13
184	2	0	2	0	14	7	19	22	27	38	3	2	17	3	4	15
192	0	0	0	0	21	16	30	24	12	28	3	0	2	0	3	0
200	1	0	0	0	18	14	28	12	5	22	0	0	1	0	1	2
208	0	0	0	0	11	18	24	3	6	15	0	1	5	0	0	0
216	3	0	0	0	5	8	8	0	1	2	0	0	4	1	0	0
224	0	0	0	0	4	3	4	0	1	2	0	0	1	1	0	0
232	0	0	0	0	7	14	3	1	1	1	0	0	1	1	0	0
240	0	0	0	0	6	8	2	0	0	1	0	0	1	0	0	0
248	0	0	0	0	8	9	1	0	1	5	0	0	0	0	0	0
256	0	0	1	0	7	7	1	0	0	0	0	0	0	0	0	0
264	0	0	0	0	4	3	0	0	0	0	0	0	0	0	0	0
272	0	0	0	0	8	7	4	0	0	0	0	0	0	0	0	0
280	0	0	0	0	4	2	0	0	0	0	0	0	0	0	0	0
288	0	0	0	0	8	6	0	0	0	0	0	0	0	0	0	0
296	0	0	0	0	0	3	0	0	0	0	0	0	0	0	0	0
304	0	0	0	0	0	0	0	0	0	0	0	0	0	0	0	0
312	0	0	0	0	0	0	0	0	0	0	0	0	0	0	0	0
320	0	0	0	0	0	0	0	0	0	0	0	0	0	0	0	0
328	0	0	0	0	0	0	0	0	0	0	0	0	0	0	0	0
336	0	0	0	0	0	0	0	0	0	0	0	0	0	0	0	0
344	0	0	0	0	0	0	0	0	0	0	0	0	0	0	0	0
Total pupae	297	306	331	482	129	126	129	75	66	125	26	11	52	16	75	66
Hours AED	w1118		w1118		cdk8k185		cdk8k185				cycCy5				cycCy5
	ethanol-1	ethanol-2	20E-1	20E-2	ethanol-1	ethanol-2	20E-1	20E-2	20E-3	20E-4	ethanol-1	ethanol-2	ethanol-3	ethanol-4	20E-1	20E-2
80	0	0	0	0	0	0	0	0	0	0	0	0	0	0	0	0
88	0	0	0	0	0	0	0	0	0	0	0	0	0	0	0	0
96	0	288	0	192	0	0	0	0	0	0	0	0	0	0	0	0
104	0	1144	0	832	0	0	0	0	0	0	0	0	0	0	0	0
112	2016	18704	336	8064	0	0	0	0	0	0	0	0	0	0	0	0
120	9600	12960	8640	24720	0	0	0	0	0	0	0	0	0	0	0	0
128	13696	1280	17536	19968	0	0	0	0	0	128	0	0	0	0	128	0
136	7616	408	10472	3944	0	0	0	0	0	0	0	136	0	0	0	0
144	2016	144	2592	720	0	0	0	0	0	0	0	288	0	0	432	0
152	1216	456	912	608	0	0	0	0	0	0	304	456	0	304	2736	608
160	1120	0	2080	0	0	0	0	160	640	160	1920	320	320	480	6080	2560
168	168	0	0	0	0	0	0	0	168	336	0	0	1680	840	0	2688
176	0	0	352	0	704	176	880	2112	1232	1232	1056	0	1408	0	1232	2288
184	368	0	368	0	2576	1288	3496	4048	4968	6992	552	368	3128	552	736	2760
192	0	0	0	0	4032	3072	5760	4608	2304	5376	576	0	384	0	576	0
200	200	0	0	0	3600	2800	5600	2400	1000	4400	0	0	200	0	200	400
208	0	0	0	0	2288	3744	4992	624	1248	3120	0	208	1040	0	0	0
216	648	0	0	0	1080	1728	1728	0	216	432	0	0	864	216	0	0
224	0	0	0	0	896	672	896	0	224	448	0	0	224	224	0	0
232	0	0	0	0	1624	3248	696	232	232	232	0	0	232	232	0	0
240	0	0	0	0	1440	1920	480	0	0	240	0	0	240	0	0	0
248	0	0	0	0	1984	2232	248	0	248	1240	0	0	0	0	0	0
256	0	0	256	0	1792	1792	256	0	0	0	0	0	0	0	0	0
264	0	0	0	0	1056	792	0	0	0	0	0	0	0	0	0	0
272	0	0	0	0	2176	1904	1088	0	0	0	0	0	0	0	0	0
280	0	0	0	0	1120	560	0	0	0	0	0	0	0	0	0	0
288	0	0	0	0	2304	1728	0	0	0	0	0	0	0	0	0	0
296	0	0	0	0	0	888	0	0	0	0	0	0	0	0	0	0
304	0	0	0	0	0	0	0	0	0	0	0	0	0	0	0	0
312	0	0	0	0	0	0	0	0	0	0	0	0	0	0	0	0
320	0	0	0	0	0	0	0	0	0	0	0	0	0	0	0	0
328	0	0	0	0	0	0	0	0	0	0	0	0	0	0	0	0
336	0	0	0	0	0	0	0	0	0	0	0	0	0	0	0	0
344	0	0	0	0	0	0	0	0	0	0	0	0	0	0	0	0
Total Time	38664	35384	43544	59048	28672	28544	26120	14184	12480	24336	4408	1776	9720	2848	12120	11304
Average Time	130.182	115.634	131.553	122.506	222.264	226.54	202.481	189.12	189.091	194.688	169.538	161.455	186.923	178	161.6	171.273
	Hours	ethanol	S.D.	20E	S.D.	TTEST (-20E VS +20E)	TTEST (mutant VS WT, -20E)	TTEST (mutant VS WT, +20E)
	w1118	122.908	10.2869	127.03	6.39694	0.338943
	cdk8k185	224.402	3.02367	193.845	6.33013	0.00171616	0.00276694	0.000131414
	cycCy5	173.979	10.959	166.436	6.83965	0.21832	0.00272981	0.0135478

## Sheet: Figure 5D
Figure 5D Quantification of EcR target gene expression in salivary glands by qRT-PCR
Plate I									Plate II
Sample Name	Target Name	FOLD	Fold Mean	STD	Normalized Folds Mean	Normalized S.D.	t-test		Sample Name	Target Name	FOLD	Fold Mean	STD	Normalized Folds Mean	Normalized S.D.	t-test
w1118-2	sgs1-2	1	0.667547	0.288074	1	0.431541			w1118-1	Br	1	1.12371	0.114452	1	0.101851
w1118-3	sgs1-2	0.491674							w1118-2	Br	1.22582
w1118-4	sgs1-2	0.510969							w1118-3	Br	1.14531
k8-1	sgs1-2	0.00125083	0.00194435	0.000766155	0.00291268	0.00114772	0.00805205	**	cdk8-1	Br	0.364245	0.373526	0.0382082	0.332404	0.0340018	0.000210815	**
k8-2	sgs1-2	0.00181544							cdk8-2	Br	0.41552
k8-3	sgs1-2	0.00276678							cdk8-3	Br	0.340814
y5-2	sgs1-2	0.0484073	0.0386635	0.0106526	0.0579187	0.0159579	0.00972969	**	cycC-1	Br	0.83298	0.712273	0.240044	0.633857	0.213617	0.0276214	*
y5-3	sgs1-2	0.0272899							cycC-2	Br	0.868007
y5-4	sgs1-2	0.0402932							cycC-3	Br	0.435832
w1118-2	sgs5-1	1	1.06653	0.0636269	1	0.0596579
w1118-3	sgs5-1	1.0728
w1118-4	sgs5-1	1.12679
k8-1	sgs5-1	0.0106959	0.0109452	0.000778444	0.0102624	0.000729886	4.36617e-06	**
k8-2	sgs5-1	0.0118177
k8-3	sgs5-1	0.0103218
y5-2	sgs5-1	0.0820287	0.0887365	0.00597562	0.0832012	0.00560287	6.02518e-06	**
y5-3	sgs5-1	0.0906896
y5-4	sgs5-1	0.0934912
w1118-2	ImpE	1	1.09493	0.0947902	1	0.086572
w1118-3	ImpE	1.18958
w1118-4	ImpE	1.09521
k8-1	ImpE	0.0922202	0.109037	0.0321973	0.0995838	0.0294058	3.46394e-05	**
k8-2	ImpE	0.146161
k8-3	ImpE	0.0887308
y5-2	ImpE	0.0889359	0.0760329	0.0124286	0.0694409	0.011351	2.53378e-05	**
y5-3	ImpE	0.0641404
y5-4	ImpE	0.0750223
Plate III									Plate IV
Sample Name	Target Name	FOLD	Fold Mean	STD	Normalized Folds Mean	Normalized S.D.	t-test		Sample Name	Target Name	FOLD	Fold Mean	STD	Normalized Folds Mean	Normalized S.D.	t-test
w1118-1	E74	1	0.88867	0.0973928	1	0.109594			w1118-1	E78	1	1.18806	0.189806	1	0.159762
w1118-2	E74	0.819237							w1118-2	E78	1.18461
w1118-3	E74	0.846772							w1118-3	E78	1.37957
cdk8-1	E74	0.147565	0.178407	0.0291229	0.200758	0.0327714	0.000133716	**	cdk8-1	E78	0.215462	0.167193	0.0434507	0.140728	0.0365728	0.000407655	**
cdk8-2	E74	0.182222							cdk8-2	E78	0.131204
cdk8-3	E74	0.205435							cdk8-3	E78	0.154913
cycC-1	E74	0.495817	0.463799	0.0293562	0.521903	0.0330338	0.000968511	**	cycC-1	E78	0.266376	0.2315	0.0380622	0.194855	0.0320373	0.000511671	**
cycC-2	E74	0.45743							cycC-2	E78	0.1909
cycC-3	E74	0.438151							cycC-3	E78	0.237224
w1118-1	E75	1	0.871541	0.112115	1	0.12864
w1118-2	E75	0.793399
w1118-3	E75	0.821224
cdk8-1	E75	0.246924	0.278349	0.0418232	0.319376	0.0479877	0.000505405	**
cdk8-2	E75	0.262304
cdk8-3	E75	0.325819
cycC-1	E75	0.543812	0.502695	0.0385169	0.576789	0.0441941	0.00286689	**
cycC-2	E75	0.467453
cycC-3	E75	0.496821

## Sheet: Figure 5E
Figure 5E ChIP assay of USP binding to EcR target gene promoters in the w1118, cdk8K185, and cycCY5 mutant larvae
		Average	SD	t-test		Average	SD	t-test
w1118-Ctrl-GPNS	Hsp27	1.00889	0.162674	0.000765591	E74	1.02536	0.250105	5.6834e-05
w118-UspIP		5.3236	0.956923			5.70098	1.85664
w1118-Ctrl-GPNS	E78	1.03033	0.287642	0.0109405	E75	1.01467	0.19438	1.58875e-05
w118-UspIP		3.40715	1.09241			2.81072	0.585562
K185-Ctrl-GPNS	Hsp27	1.14859	0.636437	0.0983071	E74	1.20665	0.854817	0.481112
K185-UspIP		2.16641	1.68593			1.16792	1.72302
K185-Ctrl-GPNS	E78	1.75212	1.85131	0.243247	E75	1.04089	0.48494	0.417354
K185-UspIP		1.14156	0.925526			1.11654	0.716479
Cy5-Ctrl-GPNS	Hsp27	1.02204	0.232783	0.340714	E74	1.12183	0.510774	0.106681
Cy5-UspIP		1.30753	1.63777			1.9224	1.38427
Cy5-Ctrl-GPNS	E78	1.10515	0.517958	0.283594	E75	1.01805	0.212709	0.428876
Cy5-UspIP		1.7001	2.4129			0.935457	1.08343

## Sheet: Figure 6H
Figure 6H Yeast two-hybrid analyses show that EcR-AF1, but not EcR-AF2 or USP-AF1/2, can directly bind to CDK8 and Med14
	beta-Gal Activity
	average	s.d.
EcR-AF1	0.245146	0.0517595
EcR-AF2	0.0371244	0.0104706
EcR-AF1 + dCDK8	0.957784	0.170708
EcR-AF2 + dCDK8	0.00987	0.005151
USP-AF1 + dCDK8	0.011556	0.005026
USP-AF2 + dCDK8	0.010698	0.005026
EcR-AF1 + dMed14	0.824932	0.0757171
EcR-AF2 + dMed14	0.0374775	0.0156179

[truncated: 16 more sheets: Figure 7C-K, Figure 8B-G, Figure 8H, Figure 9D, Figure 9E-H, Figure S2A, Figure S2B, Figure S6D, E, Figure S7, Figure S9A, Figure S9B, Figure S9C, Figure S10A-D, Figure S10E, Figure S11A-F, Figure S12B-K]
